## External location of touch is constructed post-hoc based on limb choice

Femke Maij<sup>#3</sup>, Christian Seegelke<sup>#1,2</sup>, W. Pieter Medendorp<sup>3</sup>, Tobias Heed<sup>1,2</sup>

<sup>1</sup>Faculty of Psychology and Sports Science, Bielefeld University, Bielefeld, Germany

<sup>2</sup>Center of Excellence Cognitive Interaction Technology (CITEC), Bielefeld University, Bielefeld, Germany

<sup>3</sup>Donders Institute for Brain, Cognition and Behaviour, Radboud University Nijmegen, Nijmegen, The Netherlands

#These authors contributed equally to this work

*Running head:* Post-hoc construction of tactile external location

*Correspondence:* Tobias Heed, [tobias.heed@uni-bielefeld.de](mailto:tobias.heed@uni-bielefeld.de)

## 1 **Abstract**

2           When humans indicate on which hand a tactile stimulus occurred, they  
3 often err when their hands are crossed. This finding seemingly supports the  
4 view that the automatically determined touch location in external space affects  
5 limb assignment: the crossed right hand is localized in left space, and this  
6 conflict presumably provokes hand assignment errors. Here, participants  
7 judged on which hand the first of two stimuli, presented during a bimanual  
8 movement, had occurred, and then indicated its external location by a reach-  
9 to-point movement. When participants incorrectly chose the hand stimulated  
10 second, they pointed to where that hand had been at the correct, first time point,  
11 though no stimulus had occurred at that location. This behavior suggests that  
12 stimulus localization depended on hand assignment, not vice versa. It is, thus,  
13 incompatible with the notion of automatic computation of external stimulus  
14 location upon occurrence. Instead, humans construct external touch location  
15 post-hoc and on demand.

16

## 17 Introduction

18 Spatial perception and actions rely on multiple spatial codes, often  
19 associated with different reference frames. For instance, the accuracy of  
20 pointing or reaching with an arm or finger to a visual target depends not only on  
21 the position of target relative to gaze (Fiehler et al., 2011; Thompson et al.,  
22 2014), but also on salient world-centered landmarks (Schütz et al., 2013).  
23 Similarly, judgment of visual location during whole-body movement is  
24 influenced by a target's position relative to gaze, as well as by the location of  
25 the target relative to the body (Tramper & Medendorp, 2015).

26 In touch, too, space is coded in several reference frames. Touch  
27 activates specialized sensory receptors embedded in the skin, and the  
28 arrangement of the peripheral sensors is reflected in the homuncular  
29 organization of primary somatosensory cortex (Penfield & Boldrey, 1937; Roux  
30 et al., 2018), referred to as a skin-based or somatotopic layout. However,  
31 because our body can take various postures, the stimulus location in space –  
32 often referred to as its external location – must be derived by combining skin  
33 location and body posture, a process termed tactile remapping (Heed, Buchholz,  
34 et al., 2015). Indeed, there is evidence that external tactile locations can be  
35 coded in a gaze-centered reference frame (Harrar & Harris, 2010; Mueller &  
36 Fiehler, 2014a, 2014b), but also relative to anchors such as the head, torso,  
37 and hand (Alsmith et al., 2017; Heed et al., 2016).

38 It is less clear, however, according to which principles these different  
39 spatial codes are employed. Both bottom-up features such as the availability of  
40 sensory information (Bernier & Grafton, 2010) and the spatial reliability of a  
41 sensory channel (Ernst & Banks, 2002; van Beers et al., 2002), as well as top-  
42 down information such as task-constraints (Badde et al., 2015; Schubert et al.,  
43 2017), action context (Mueller & Fiehler, 2014b), and cognitive load (Badde et  
44 al., 2014) can affect the relative contributions of different reference frames,  
45 presumably in a weighted manner (Angelaki et al., 2009; Atsma et al., 2016;  
46 Badde & Heed, 2016; Ernst & Di Luca, 2011; Kayser & Shams, 2015; Lohmann  
47 & Butz, 2017; Tramper & Medendorp, 2015). Yet, whereas there is widespread

48 consensus that each spatial code can have more or less influence depending  
49 on the specific situation, it is currently not known whether all putative codes are  
50 always constructed, or whether they are only computed based on demand.

51 For touch, it has been suggested that the construction of spatial location  
52 is an automatic process, implying that any tactile input is remapped into an  
53 external code, irrespective of its relevance (Heed & Azañón, 2014; Röder et al.,  
54 2004). The most common experimental manipulation underlying this claim is  
55 limb crossing. Crossing, say, a right arm over to the left side of space leads to  
56 different skin-based (here: right body side) and external (here: left side of  
57 space) spatial codes of a tactile stimulus delivered to the right hand. A task-  
58 irrelevant tactile stimulus delivered to a crossed right hand accelerates visual  
59 discrimination in the right visual field if it precedes the visual target stimulus by  
60 60 ms, but on the left side if it leads by 180 ms or more (Azañón & Soto-Faraco,  
61 2008). Thus, responses to visual targets were faster after anatomically  
62 congruent tactile cues (e.g., tactile stimulus on crossed right hand, visual target  
63 in right hemifield) at short cue-stimulus intervals, but after externally congruent  
64 tactile cues (e.g., tactile stimulus on the left hand crossed over to the right side,  
65 visual target in right field) at long cue-stimulus intervals. Such effects are  
66 usually interpreted as evidence that tactile remapping – the precise  
67 computation of the external tactile stimulus location – is automatic and forms  
68 the basis for the performance enhancement at this external location.

69 The same conclusion has also been drawn from results obtained with  
70 the tactile temporal order judgment (TOJ) task; in this task, participants report  
71 which of two successive tactile stimuli, each presented to a different body part  
72 – typically the two hands – occurred first (Heed & Azañón, 2014; Shore et al.,  
73 2002; Yamamoto & Kitazawa, 2001). When the time interval between the two  
74 stimuli is short, participants sometimes choose the wrong stimulus. Notably,  
75 stimulus confusion is much more prominent when the arms are in a crossed  
76 than uncrossed posture. This is surprising because the TOJ task asks about  
77 the identity of the touched limb, and, in theory, it would be irrelevant to this  
78 question where the hand was in space. That limb crossing, nevertheless,

79 affects TOJ implies that posture cannot be strategically ignored, but is  
80 automatically incorporated into the hand assignment.

81 Several explanations have been put forward to account for crossing  
82 effects in tactile localization. First, it has been suggested that touch location,  
83 once it is remapped, is retained only in an external spatial code, and the original  
84 skin location is discarded in the process. To report which body part has been  
85 touched, the brain must then reversely determine which limb was located at the  
86 computed external location at the time of the touch (Kitazawa, 2002; Kitazawa  
87 et al., 2008; Yamamoto & Kitazawa, 2001). We refer to this suggestion as the  
88 *space-to-limb reconstruction hypothesis*. When applied to errors in the TOJ task,  
89 this hypothesis implies that participants correctly remap the two tactile stimuli  
90 into external space, but then reconstruct erroneously which hand was at the  
91 first spatial location.

92 A second explanation assumes that TOJ errors reflect the conflict  
93 between different codes used for stimulus location. When the limbs are  
94 crossed, skin-based and external spatial codes point to different sides of space,  
95 and this conflict must be resolved, a process that takes time and is error-prone  
96 (Röder, Kusmirek, Spence, & Schicke, 2007; Simon, Hinrichs, & Craft, 1970).  
97 In this view, the TOJ crossing effect is a marker for the presence of conflict and,  
98 thus, for the fact that remapping into an external spatial code has taken place.  
99 Notably, the interpretation that the TOJ crossing effect derives from a remapped  
100 stimulus location is indirect because participants only report a binary decision  
101 about which hand was stimulated, not the spatial location of the perceived  
102 stimulus. Increasing the distance between the uncrossed hands can slightly  
103 reduce errors in TOJ (Gallace & Spence, 2005; Roberts et al., 2003; Shore et  
104 al., 2005), and the TOJ crossing effect is smaller when the hands' positions  
105 additionally differ in height or depth (Azañón et al., 2016). These graded  
106 modulations of the TOJ have led to the claim that the TOJ paradigm is an  
107 implicit index of tactile remapping (Azañón et al., 2015; Badde & Heed, 2016;  
108 Heed & Azañón, 2014). We refer to this suggestion as the *stimulus switch*  
109 *hypothesis*. It implies that participants have correctly remapped the two stimuli

110 into space, but have incorrectly resolved the conflict between the different  
111 spatial codes of the first stimulus, consequently assigning the incorrect stimulus  
112 to the first time point; as a consequence, participants incorrectly report the hand  
113 that received the second stimulus.

114         Importantly, both hypotheses outlined above assume that touch is  
115 automatically remapped to its veridical external location. However, recent  
116 experiments have cast doubt on whether this is actually the case. For instance,  
117 if a tactile stimulus is presented during an arm movement, and participants  
118 indicate the stimulus's location by pointing to its external location after the  
119 movement, they make systematic localization errors (Dassonville, 1995; Maij,  
120 Grave, et al., 2011; Maij et al., 2013, 2017; Watanabe et al., 2009). Importantly,  
121 because these errors differ for fast and slow movements, it has been suggested  
122 that participants do not compute the precise spatial location of a stimulus when  
123 it occurs, but instead infer spatial location post-hoc by estimating hand location  
124 at the perceived time of the tactile stimulus (Maij et al., 2017). We refer to this  
125 suggestion as the *time reconstruction hypothesis*. Accordingly, errors in the  
126 TOJ task would occur because participants first choose the incorrect hand, and  
127 then derive stimulus location based on that hand's position at the time of the  
128 first stimulus. Note, that here participants merge the correct, first stimulus's time  
129 with the incorrect, second stimulus's hand. For the present study, the key claim  
130 of the *time reconstruction hypothesis* is that stimulus location is only computed  
131 after the hand has been chosen. This feature is at odds with the idea that tactile  
132 judgments are based on spatial remapping (Heed, Buchholz, et al., 2015; Shore  
133 et al., 2002; Yamamoto & Kitazawa, 2001), according to which the stimulus  
134 location is determined first and then used to make the hand assignment – in  
135 fact, the time reconstruction hypothesis reverses the dependency between  
136 localization and limb assignment proposed by other the theoretical accounts.

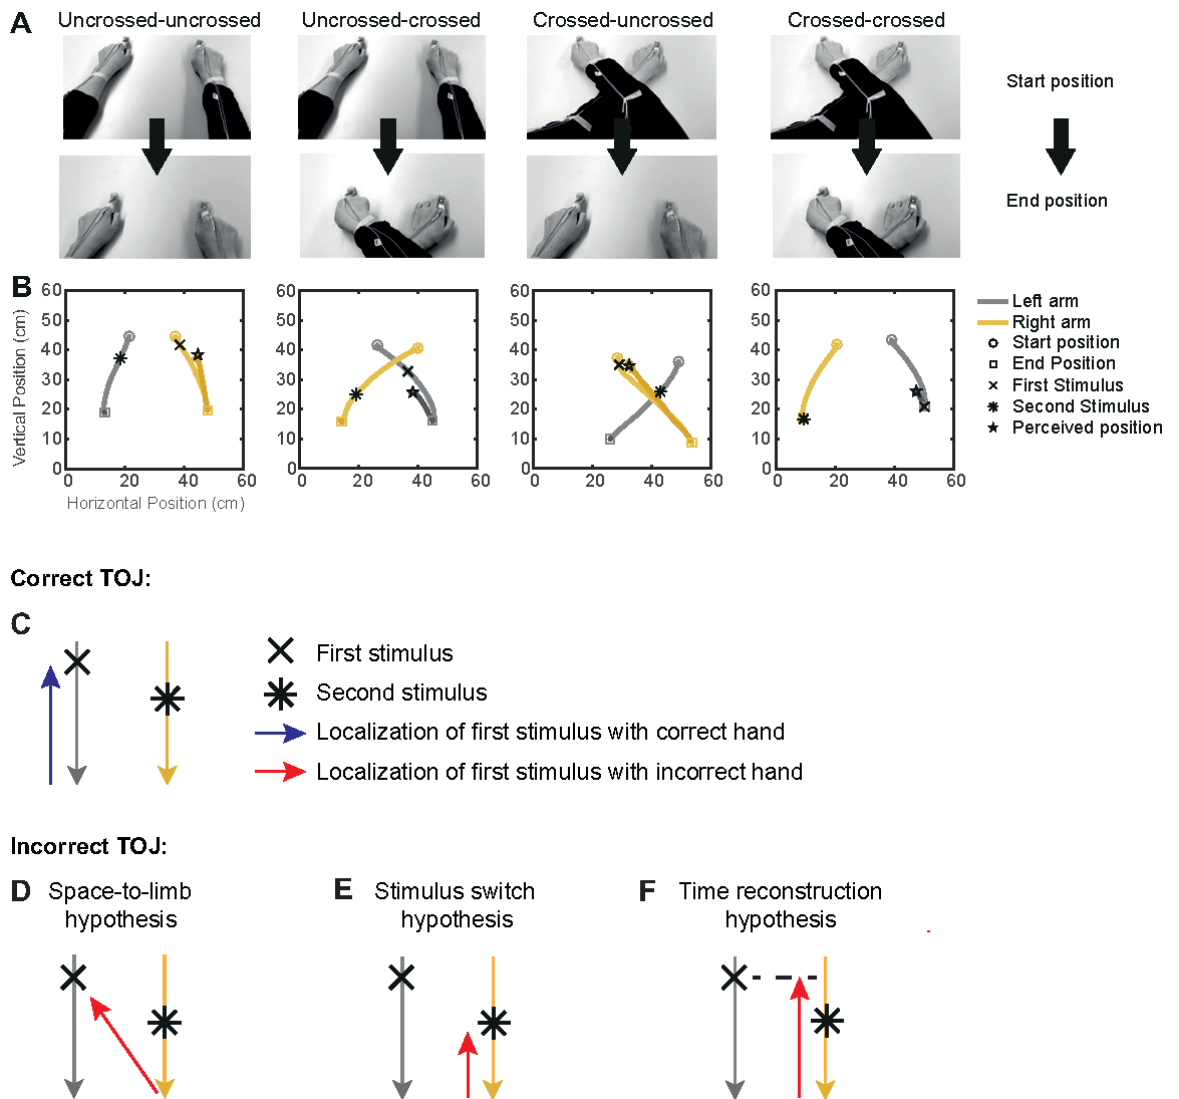

137

138 **Figure 1.** Experimental conditions of Experiment 1 and predictions of the tested tactile  
 139 localization hypotheses. A-B. Experimental procedure. A. The arms moved from an uncrossed  
 140 or crossed start posture to an uncrossed or crossed arm end posture. B. Representative  
 141 example TOJ trial showing the bimanual movement (grey, left hand; yellow, right hand) for the  
 142 four combinations of uncrossed and crossed start and end postures, as well as the reach-to-  
 143 point movement of the hand at which the first tactile stimulus was reported. C. Illustration of a  
 144 correct TOJ trial: the stimulus is assigned to the correct hand, which points to the correct  
 145 location. Grey (yellow) traces illustrate the left (right) hand's movement toward the body, here  
 146 during a trial from an uncrossed start to an uncrossed end posture. The blue arrow indicates  
 147 the movement of the correctly assigned hand towards the location of the first stimulus (cross).  
 148 D-F. Illustration of the three hypotheses that may account for TOJ errors. The red arrows  
 149 indicate the movement of the incorrectly chosen hand. D. Space-to-limb reconstruction  
 150 hypothesis: participants point with the incorrect hand at the external location of the first stimulus.  
 151 E. Stimulus switch hypothesis: participants point with the incorrect hand at the external location

152 *of the second stimulus (star). F. Time reconstruction hypothesis: participants point with the*  
153 *incorrect hand at the location at which that hand was at the time of the first stimulus.*

154 Here, we assessed hand assignment and spatial localization of tactile  
155 stimuli presented during movement. Our objective was to test whether TOJ  
156 responses mark the use of the stimulus's external-spatial location constructed  
157 in response to the stimulus, or whether instead participants estimate stimulus  
158 location post-hoc by integrating the hand movement trajectory with stimulus  
159 time. In other words, we aimed to directly contrast the three discussed  
160 hypotheses for tactile localization: the space-to-limb reconstruction hypothesis,  
161 the stimulus switch hypothesis, and the time reconstruction hypothesis.

162 We presented human participants with two tactile stimuli during a  
163 bimanual movement and assessed which hand participants perceived to have  
164 been stimulated first (TOJ hand assignment), as well as exactly where in space  
165 participants had perceived the first stimulus (tactile stimulus localization). The  
166 experimental logic, and its relation to the three tested tactile localization  
167 hypotheses, are illustrated in Fig. 1. Because tactile stimuli were presented  
168 shortly before, after, and during the time of movement, their spatial location  
169 depended on their timing relative to the movement. This allowed us to  
170 determine which tactile location participants had perceived when they had  
171 made a hand assignment error in the TOJ task. Contrary to common opinion,  
172 TOJ errors were not associated with the location of the second, incorrect  
173 stimulus. Instead, when participants chose the incorrect hand, they reported its  
174 location at the time point at which the first, correct stimulus had occurred. Thus,  
175 participants constructed stimulus location by combining the position of the  
176 incorrectly chosen hand with the stimulus timing that belonged to the other, non-  
177 chosen hand's stimulus, resulting in reported locations at which no stimulus had  
178 ever occurred. This finding invalidates current explanations of crossing effects  
179 as being based on the remapped external spatial location of the tactile stimulus.



## 180 **Results**

### 181 **Experiment 1**

182 Participants adopted a start posture with their hands resting on a table  
183 and their arms stretched out in an uncrossed or crossed posture (see Fig. 1A,B  
184 for an illustration of experimental conditions and trial timing). A tone then  
185 instructed a movement of the two hands about 30 cm towards their body,  
186 bringing the arms into either an uncrossed or crossed arm end posture (see  
187 Fig. 1A). Shortly before, during, or shortly after the movement, participants  
188 received two tactile stimuli, one on each hand, with a stimulus onset asynchrony  
189 (SOA) of 110 ms. At this SOA, participants often misreport which of the two  
190 stimuli occurred first, both when the arms are still (Heed & Azañón, 2014; Shore  
191 et al., 2002; Yamamoto & Kitazawa, 2001) and during movement (Heed, Möller,  
192 et al., 2015; Hermsillo et al., 2011). After the bimanual movement, participants  
193 reported on which of the two hands the first stimulus had occurred by reaching  
194 with this hand to the perceived external location of the stimulus (see Fig. 1B).  
195 The response, thus, contained two components: the hand to which the first  
196 stimulus was assigned, and explicit spatial localization of this stimulus.

### 197 **Hand assignment**

198 In a first step, we verified that hand assignment in the TOJ task was modulated  
199 by hand crossing and timing of stimuli relative to the movement (Heed, Möller,  
200 et al., 2015; Hermsillo et al., 2011). We measured TOJ performance as the  
201 percentage of correct reports of which hand had been stimulated first in the TOJ  
202 task, as indicated by the hand that participants used for their localization  
203 response (see Fig. 2). Stimuli could occur during all times (see Methods for  
204 details), so we binned the binary (correct/ incorrect) TOJ response data into  
205 four movement phases – stimulation before movement onset, during first and  
206 second half of movement, and after movement offset – to assess the  
207 modulation of TOJ performance by stimulus time relative to the bimanual  
208 movement.

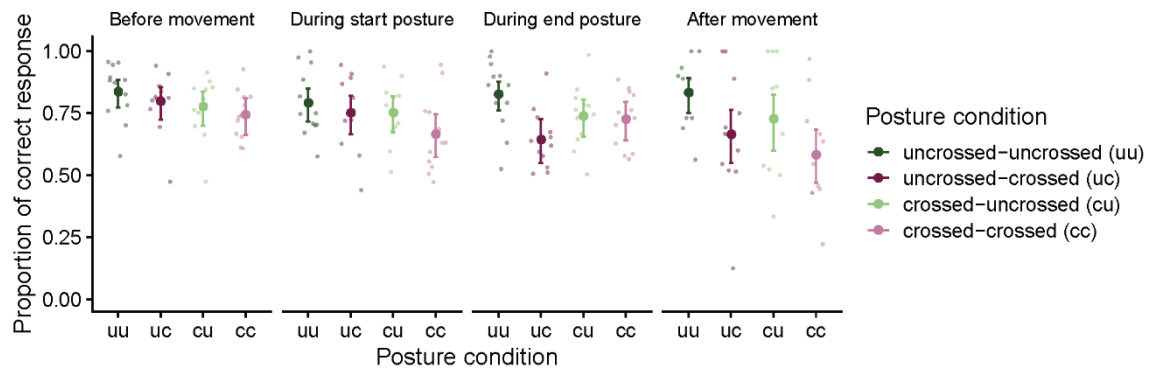

209

210 **Figure 2.** Proportion of correct hand assignment across movement conditions (uncrossed-  
211 uncrossed, uncrossed-crossed, crossed-uncrossed, crossed-crossed) in the four phases of the  
212 bimanual movement (before movement, during start posture, during end posture, after  
213 movement) in Experiment 1. For conditions without a postural change (i.e., uncrossed-  
214 uncrossed, crossed-crossed), trials were assigned as “during start posture” if the first stimulus  
215 occurred during the first temporal half of the movement and they were assigned as “during end  
216 posture” if the first stimulus occurred during the second temporal half of the movement. For  
217 conditions with a postural change (i.e., uncrossed-crossed, crossed-uncrossed), trials were  
218 assigned as “during start posture” if the first stimulus occurred before the postural change and  
219 as “during end posture” if the first stimulus occurred after the postural change. Error bars denote  
220 2 s.e. from the mean; asymmetry is due to nonlinear conversion from the GLMM’s logit scale  
221 to percentage correct. Large symbols are group means, small symbols are individual  
222 participants’ performance.

223 In accordance with previous findings, TOJ performance declined in the crossed  
224 compared to the uncrossed posture (Heed & Azañón, 2014), and depended on  
225 the posture at the time of stimulation (Heed, Möller, et al., 2015; Hermosillo et  
226 al., 2011). For instance, for the uncrossed-uncrossed movement condition (see  
227 Fig. 2, dark-green data points), the probability of a correct response was high  
228 compared to the crossed-crossed movement condition (see Fig. 2, light  
229 magenta data points) throughout all movement phases. For the conditions with  
230 a postural change (uncrossed-crossed, crossed-uncrossed, see Fig. 2, dark-  
231 magenta, light-green data points) the probability of correct responses was  
232 modulated by the posture at the time of stimulation. A generalized mixed model  
233 (GLMM) with factors Start Posture, End Posture, and Movement Phase  
234 revealed significance for all main effects and interactions (see Supplementary

235 Table 1). With movement phase, the effect of Start Posture (see Fig. 2, dark vs.  
236 light colors) declined, whereas the effect of End Posture (see Fig. 2, green vs.  
237 magenta colors) increased. For instance, for movements from an uncrossed to  
238 a crossed posture, TOJ performance was better during the first two movement  
239 phases, that is, when the hands were still uncrossed, than during the last two  
240 movement phases, that is, when the hands were crossed.

241 In sum, TOJ performance in our first experiment reflected known  
242 modulations of hand posture and movement timing. Participants made, on  
243 average, more than 15% TOJ errors even with uncrossed hands. This high error  
244 rate is due to the use of the short SOA of 110 ms (Heed, Möller, et al., 2015;  
245 Heed & Azañón, 2014; Shore et al., 2002; Yamamoto & Kitazawa, 2001), and  
246 is an intended outcome of the experimental paradigm, allowing, as a next step,  
247 comparison of spatial localization responses for incorrect TOJ trials across all  
248 postures.

### 249 **Explicit tactile localization in space is unaffected by hand posture**

250 Having verified that TOJ hand assignment showed the well-known  
251 effects of posture, we next turned to tactile stimulus localization. Localization  
252 errors are computed as the spatial difference (calculated as signed difference  
253 in the direction along the path of the reporting hand, see Methods for details) of  
254 the perceived stimulus location and the hand's true position at stimulus  
255 presentation. From previous studies involving single stimuli and unimanual  
256 movements, it is known that participants make systematic localization errors  
257 when they retrospectively point to the spatial location of a tactile stimulus that  
258 was presented while the target limb was moving. More specifically, localization  
259 is systematically biased in the direction of the movement during the initial part  
260 of a movement, and in the opposite direction during the final part of the  
261 movement (Dassonville, 1995; Maij et al., 2013, 2017; Watanabe et al., 2009),  
262 resulting in systematic localization error curves with positive values indicating  
263 errors in movement direction and negative values indicating errors in the  
264 opposite direction. This pattern of movement time-related directional biases  
265 was evident also in the present data (see Fig. 3A for an example of a single

266 participant). Critically, bias was comparable across all four posture conditions  
267 (see Fig. 3B).

268 To validate that localization behavior in our task was not biased by the  
269 specifics of the TOJ task, participants performed a simpler 1-stimulus control  
270 task in separate blocks of the experiment. While making bimanual movements  
271 with uncrossed and crossed start and end postures, they received a single  
272 tactile stimulus and pointed to it, as in the 2-stimulus task (see Methods for  
273 details). Participants virtually always indicated correctly which hand had  
274 received the stimulus (average percentage correct, 99.5%). Critically,  
275 localization error curves were indistinguishable from the task with two stimuli  
276 (see Fig. 3C), indicating that tactile localization was affected neither by task  
277 difficulty nor by the nature of the TOJ task.

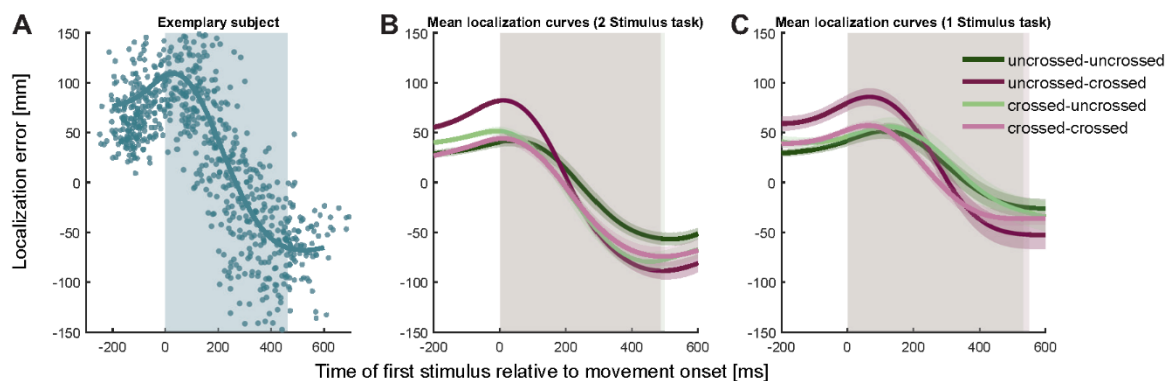

278

279 **Figure 3.** Localization errors systematically vary with the progression of the movement. A.  
280 Mean localization error (teal line) of all correct TOJ trials of a single participant in Experiment  
281 1. Each dot represents the localization error of a single trial, that is the difference between  
282 actual hand position at the time of tactile stimulation and indicated hand position at the end of  
283 the trial. Blue shading represents the average movement time, with 0 ms = movement start.  
284 Note, that the localization error is positive at the beginning of the movement, indicating error in  
285 the direction of the movement. Localization error is negative towards the end of the movement,  
286 indicating error against the direction of movement. B-C. The localization error pattern of the  
287 correct trials in A was evident across all subjects for both the 2 Stimulus experimental task (B)  
288 and for the 1 Stimulus control task (C) and for all posture combinations. Traces reflect the mean,  
289 shaded areas around the traces reflect s.e.m. The shaded regions in the background indicate  
290 the average movement duration, which differed slightly between conditions (see  
291 Supplementary Table 2).

292 **Explicit tactile localization is directed towards the assigned hand**

293         We have so far assessed performance in trials in which participants had  
294 made a correct TOJ hand assignment (referred to as correct TOJ trials from  
295 hereon). We now turn to localization errors in incorrect TOJ trials. These errors  
296 allow differentiating between the three hypotheses about how participants  
297 determine stimulus localization in tactile decision paradigms (see Fig. 1D-F).

298         We first turn to the *space-to limb reconstruction hypothesis*. It posits that  
299 tactile perception takes place in space rather than on the body; thus, a limb  
300 assignment entails computing which limb was at the first spatial location. Thus,  
301 in our task, responses with the incorrect hand would result from assigning the  
302 incorrect hand to the correct spatial location of the first tactile stimulus (see Fig.  
303 1D). Accordingly, the assigned, incorrect hand should be directed to the  
304 location at which the stimulus of the other, correct hand had occurred, and the  
305 reported stimulus location in incorrect TOJ trials should scatter around the  
306 movement trajectory of the correct hand. Contrary to this prediction, participants  
307 consistently pointed to locations scattered around the movement trajectory of  
308 the assigned, incorrect hand, indicating that the chosen stimulus had been  
309 perceived on the incorrect hand (see Fig. 4 for the localization responses of the  
310 participant with the largest variability in localization errors). Thus, localization  
311 behavior did not support the implication of the *space-to-limb reconstruction*  
312 *hypothesis* that the correct external spatial location is simply assigned to a  
313 wrong limb.

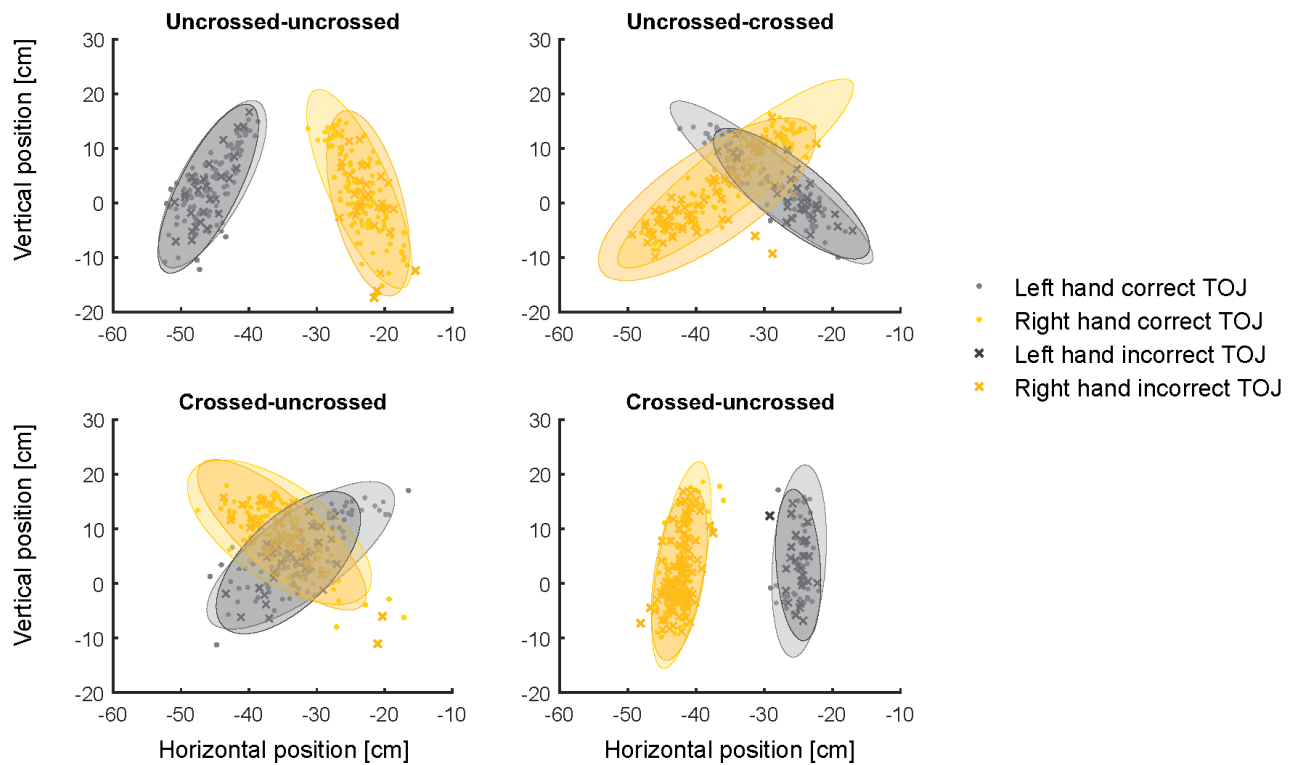

315 **Figure 4.** Localization responses (*i.e.*, finger positions in the horizontal plane at the end of the  
316 reach-to-point movement indicating the location where the participant perceived the first  
317 stimulus) for the different movement conditions. Data are from a single participant with the  
318 largest variability. Ellipses represent 95% of the variability and show large overlap for correct  
319 and incorrect TOJ trials. The space-to-limb reconstruction hypothesis would predict that, during  
320 error trials, participants point with the incorrectly assigned hand to the location of the correct  
321 stimulus; thus, if this hypothesis were correct, orange ellipses should overlay with light grey  
322 ellipses, and dark grey ellipses should overlay with yellow ellipses.

### 323 Localization aims at the assigned hand's position at the time of the first 324 tactile stimulus

325 Given that participants appear to have perceived the stimulus at the  
326 assigned hand, two possibilities remain as to which stimulus location was  
327 associated with erroneous responses (see Fig. 1). The *stimulus switch*  
328 *hypothesis* posits that the two stimuli were localized correctly, and one is  
329 chosen for the response. In incorrect TOJ trials, participants would confuse the  
330 two stimuli and report the second stimulus by pointing at its location with the  
331 respective, incorrect hand. In this case, participants should point to where the  
332 hand was positioned at the time point of the *second*, erroneously chosen

333 stimulus (referred to as time 2 from hereon). In contrast, the *time reconstruction*  
334 *hypothesis* assumes that participants always use the correct, first time point  
335 (time 1 from hereon), and determine the position of the assigned response limb  
336 at this time point. This hypothesis predicts that, in incorrect TOJ trials,  
337 participants point to where the incorrectly assigned hand was positioned at the  
338 correct time, that is, time 1. Note, that no tactile stimulus occurred at this  
339 external spatial location, because it combines the time of the first, correct  
340 stimulus with the movement trajectory of the second, incorrect stimulus's hand.

341 We test between the predictions of these hypotheses by comparing the  
342 localization error curves in correct and incorrect TOJ trials. In the case of correct  
343 TOJ trials, we assume that participants aimed, as instructed, at the position of  
344 the correct hand at time 1. Therefore, we derive the localization error curve as  
345 the spatial difference of perceived location and hand position at time 1 (see Fig.  
346 5, dark blue lines). However, we can also derive a localization error curve for  
347 correct trials under the assumption that participants pointed towards the hand's  
348 position at time 2. To derive this hypothetical curve, we calculated the spatial  
349 difference of participants' localization responses and the hand's position at time  
350 2, rather than time 1 (see Fig. 5, light blue lines). The time 2 error curve is  
351 shifted to the left, or "backwards" in time, relative to the time 1 error curve. This  
352 is because, for the time 2 curve, the assumed "true" target location is the hand's  
353 position 110 ms further into the movement, due to the SOA between the two  
354 tactile stimuli. Accordingly, each assumed target location is closer to the  
355 movement's end by the trajectory the hand has moved during the 110 ms  
356 interval between the two stimuli.

357 The first, time 1 error curve can now serve as a template of a localization  
358 error curve if the participant truly aimed at the hand's position at time 1. The  
359 second, time 2 error curve, in contrast, serves as a template of a localization  
360 error curve if the participants had truly aimed at the hand's position at time 2.  
361 For incorrect TOJ trials, we do not know whether participants aimed at where  
362 the incorrectly chosen hand was positioned at time 1 or at time 2. The rationale  
363 of our analysis, thus, is to compare the localization error curves of incorrect TOJ

364 trials with the template localization error curves derived from correct TOJ trials  
365 (see Fig. 5 and Methods).

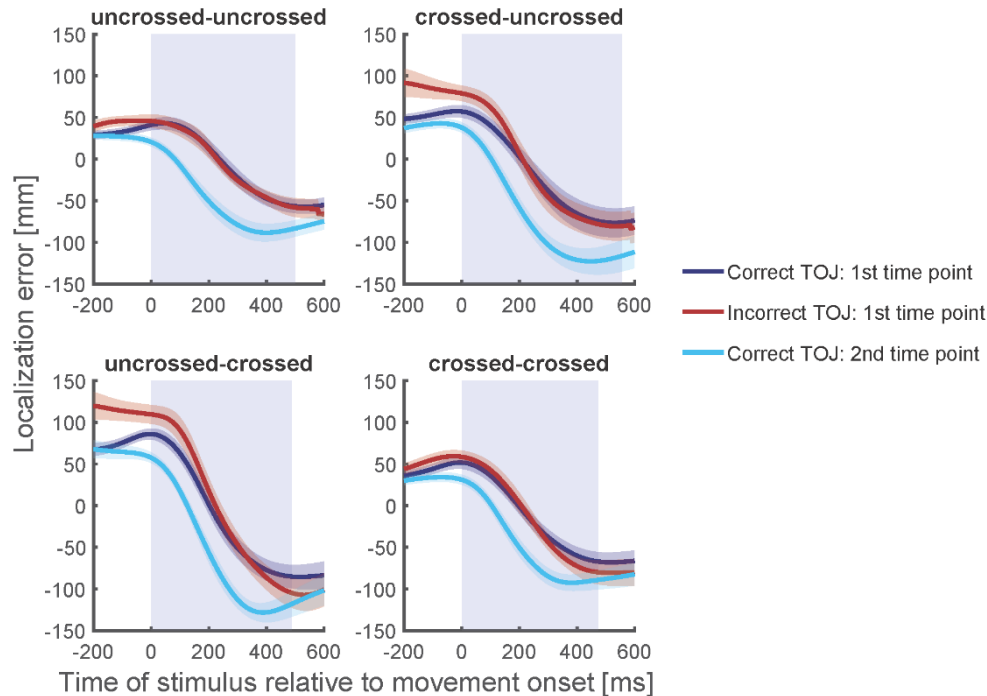

366

367 **Figure 5.** Localization curves, averaged across participants, for each of the four posture  
368 conditions in Experiment 1. Curves of incorrect TOJ trials (red) show a similar pattern as the  
369 localization curves of the correct TOJ trials at time 1 (dark blue), but not as the localization  
370 curves of the correct TOJ trials at time 2 (light blue). Traces reflect the mean localization error,  
371 shaded areas around the traces reflect s.e.m. across participants. The shaded regions in the  
372 background represent the average movement time.

373 Localization errors of incorrect TOJ trials overlapped with localization  
374 errors of correct TOJ trials at time 1 for each of the four start and end posture  
375 combinations. To quantify this further, we computed the temporal shift required  
376 to align localization errors of incorrect TOJ trials with those of correct TOJ trials  
377 (see Maij et al., 2009). If, in incorrect TOJ trials, participants aimed for the  
378 incorrect hand's position at time 1, then the temporal shift should be zero  
379 relative to the localization error curve in correct TOJ trials relative to time 1;  
380 furthermore, it should be about -110 ms (negative denoting a shift towards left,



381 see above) compared to the localization error curve of correct TOJ trials relative  
382 to time 2. If, however, participants aimed for the incorrect hand's position at  
383 time 2, the shift pattern should be exactly reverse, that is, zero compared to the  
384 second template curve, and around +110 ms compared to the first template  
385 curve.

386

387

388

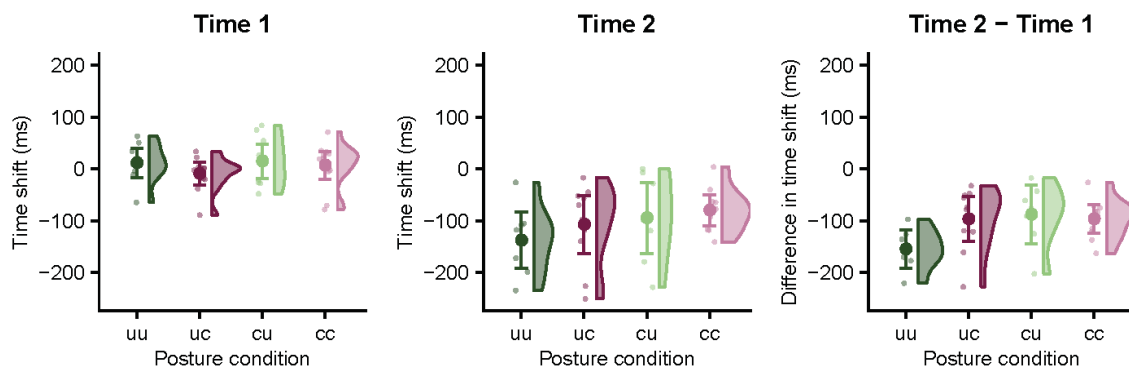

389

390 **Figure 6.** Time shift of stimulus localization error in TOJ error trials relative to time 1 (left panel)  
391 and time 2 (middle panel) for the four posture conditions in Experiment 1. The temporal shift of  
392 the localization error curve was significantly different from zero when calculated relative to time  
393 2, but not relative to time 1; this result is consistent with the time reconstruction hypothesis, but  
394 not with the stimulus switch hypothesis. This pattern was similar across all participants as  
395 demonstrated by the differences in time shift between time 2 and time 1 (right panel). Data are  
396 visualized with raincloud plots (Allen et al., 2019) that display probability density estimates,  
397 condition averages (large symbols), and individual participants (small symbols). Error bars  
398 denote 95% confidence intervals.

399 Fig. 6 displays the temporal shift between the localization error curve of  
400 incorrect TOJ trials and the error curves at time 1 and time 2 derived from  
401 correct TOJ trials.

402 We fitted a linear mixed model with two factors: factor Posture Condition  
403 coded the four combinations resulting from uncrossed and crossed start and  
404 end postures. Factor Reference Time Point coded whether the localization error  
405 curve for correct TOJ trials was computed relative to time 1 or time 2. The

406 dependent variable was the time shift that best aligns the localization error  
407 curve between correct and incorrect TOJ. This analysis revealed a significant  
408 effect of Reference Time Point ( $\chi^2(9,10) = 15.55$ ,  $p < 0.001$ ), indicating that the  
409 time shift required to align the localization error curves of correct and incorrect  
410 TOJ trials differed depending on whether localization error of correct TOJ trials  
411 was computed based on time 1 or time 2. In contrast, there was no effect of  
412 Posture Condition ( $\chi^2(7,10) = 1.57$ ,  $p = 0.67$ ) or interaction ( $\chi^2(7,10) = 4.53$ ,  $p$   
413  $= 0.21$ ) between the two factors. This latter result indicates that the relationship  
414 of localization in correct and incorrect TOJ trials held across all postures; this  
415 result is also illustrated by the very similar relationship of the different  
416 localization error curves in the four panels of Fig. 5. Thus, whereas limb posture  
417 affected hand assignment, it did not affect tactile localization.

418 To assess whether localization in incorrect TOJ trials aimed at a location  
419 related to time 1 or time 2, we tested the respective times shifts required to align  
420 the localization errors of the two types of trials against zero. The time shift  
421 between localization errors for correct TOJ trials at time 1 and incorrect TOJ  
422 trials, averaged across the four posture conditions, was 6 (s.e., 3) ms; if this  
423 value is not significantly different from 0, then an LMM of only this condition  
424 should not improve by inclusion of an intercept, as the latter would model the  
425 deviation of the average shift away from 0. The comparison of a model with and  
426 without intercept did not provide statistical evidence to reject a zero time shift  
427 ( $\chi^2(1) = 0.84$ ,  $p = 0.36$ ). Null findings are difficult to interpret in the context of  
428 frequentist statistics. Therefore, we complemented our analysis by a Bayesian  
429 analysis comparing a model with only a random participant factor with a model  
430 that, in addition, included a population intercept, equivalent to the linear mixed  
431 model reported above. The population-level intercept estimate was 6 ms and  
432 the 95% confidence range [-8.28; 19.27 ms] included 0. Model comparison via  
433 leave-one-out cross-validation found the model without intercept to be more  
434 credible than the model with the population intercept, that would have been  
435 indicative of a non-zero localization error shift between correct and incorrect  
436 TOJ trials (difference of expected log predictive density, ELPD, for second as  
437 compared to first model: -0.6, s.e. 0.9).

438 We ran the same analyses for the time shifts required to align localization  
439 error curves between correct and incorrect TOJ trials when correct trials' error  
440 curve had been calculated relative to time 2. In contrast to the results for time  
441 1, the average time shift between localization errors for correct TOJ trials at  
442 time 2 and incorrect TOJ trials was -105 (s.e., 7) ms, and a model without  
443 intercept fit this condition significantly worse than a model with the intercept  
444 ( $\chi^2(1) = 19.38$ ,  $p < 0.001$ ). The significant difference to time 2 suggests that  
445 participants did not aim at the position of the second stimulus in incorrect TOJ  
446 trials.

447 While neither the non-significant difference to time 1 in the LMM analysis,  
448 nor the Bayesian parameter estimate including 0 statistically imply equality of  
449 the error curves in correct and incorrect TOJ trials, these statistical results are  
450 consistent with the two conditions being equal, and they suggest that, if a  
451 difference exists, it is small. Furthermore, the time shift of -105 ms for time 2  
452 closely matches the stimulus SOA of 110 ms, further suggesting that, in error  
453 trials, participants did not aim for hand location at the second, but rather at the  
454 first time point. Corroborating this conclusion, the Bayesian 95% interval [-138;  
455 -76 ms] of the intercept estimate includes -110 ms, and comparison of Bayesian  
456 models for time 2 with and without intercept strongly favored the model  
457 including the intercept (difference in ELPD from first to second model, -1.4, s.e.  
458 1.9).

## 459 **Experiment 2**

460 The results of Experiment 1 suggest that when asked to localize the external  
461 location of the first of two tactile stimuli applied in succession to different  
462 hands, participants chose which hand received the stimulus and then inferred  
463 the position of the chosen limb at the time point of the first stimulus.  
464 Consequently, when participants chose the incorrect limb, stimulus location  
465 was determined as the location at which the incorrect hand was at the correct  
466 (first) time point. While these results support the *time reconstruction hypothesis*,  
467 it should be realized that Experiment 1 tested only a single SOA of 110 ms  
468 between the two tactile stimuli. If our conclusions drawn from Experiment 1 are

469 correct, then localization of stimuli assigned to the incorrect hand should always  
470 depend on the first stimulus's time, independent of SOA.

471 Experiment 2 tested this conjecture. Again, participants judged which hand had  
472 received the first of two tactile stimuli during a bimanual movement and then  
473 located the stimulus perceived to have occurred first. We presented tactile  
474 stimuli with four different SOAs: 60, 85, 110, and 135 ms. As explained in  
475 Experiment 1, the shift between the time 1 and time 2 curves of correct TOJ  
476 trials reflects the SOA of the two tactile stimuli. Accordingly, the two template  
477 curves are further apart the larger the SOA (compare light vs. dark blue lines in  
478 panels A-D of Fig. 7). As the estimated localization error curves in Experiment  
479 1 were similar for all combinations of the hands' start and end posture,  
480 Experiment 2 involved only reaches from an uncrossed to an uncrossed posture  
481 and from a crossed to a crossed posture. This strategy minimized marker  
482 obstruction and homogenized movement time across conditions (see  
483 Supplementary Table 3). Experiment 2 was conducted in a different lab than  
484 Experiment 1, using different equipment, re-written experimental code, different  
485 experimenters, and new analysis scripts (see Material and methods for details).  
486 To further scrutinize the reliability of our results, we increased our sample size  
487 and acquired a higher number of trials.

#### 488 **Hand assignment**

489 In accordance with Experiment 1 and previous findings (Heed, Möller, et al.,  
490 2015; Hermosillo et al., 2011), TOJ performance in Experiment 2 was  
491 modulated by hand posture and SOA. At all SOA, participants made large  
492 amounts of errors, ensuring that a sufficient number of trials were available to  
493 analyze incorrect TOJ trials. Detailed results are reported in the Supplementary  
494 Information (Supplementary Figure 1 and Supplementary Table 4).

#### 495 **Explicit stimulus localization in space**

496 Complementing the findings from Experiment 1 and further corroborating the  
497 *time reconstruction hypothesis*, localization errors of the incorrect TOJ trials  
498 largely overlapped with the localization errors of correct TOJ trials at time 1 for

499 each of the four SOAs (see Fig. 7) and for each subject and posture condition  
500 (see Supplementary Fig. 2-4).  
501

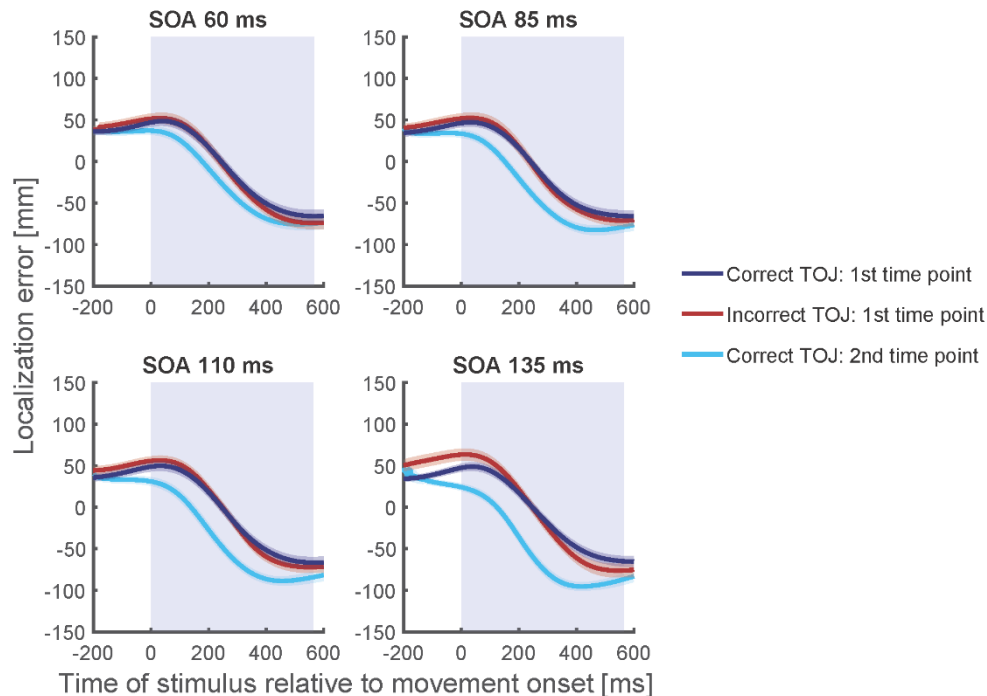

502

503 **Figure 7.** Localization curves, averaged across participants and posture, for each of the four  
504 SOAs in Experiment 2. Curves of incorrect TOJ trials (red) show a similar pattern as the  
505 localization curves of the correct TOJ trials at time 1 (dark blue), but not as the localization  
506 curves of the correct TOJ trials at time 2 (light blue). This pattern was highly similar across all  
507 subjects and also when calculated separately for each posture condition (see Supplementary  
508 Information). Traces reflect the mean, shaded areas around the traces reflect s.e.m. The  
509 shaded regions in the background represent the average movement time.

510 Fig. 8 shows the temporal shift between the localization error curves of incorrect  
511 TOJ trials and the error curves of correct TOJ trials relative to time 1 and time  
512 2 for all four SOAs.

513

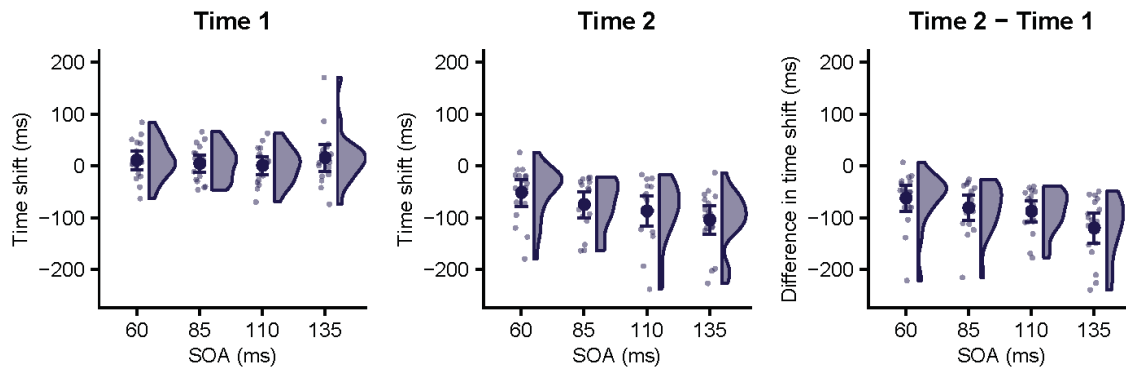

514

515 **Figure 8.** Time shift of stimulus localization error in incorrect TOJ trials relative to time 1 (left  
516 panel) and time 2 (middle panel) for the four SOAs in Experiment 2. For all SOAs, the temporal  
517 shift relative to time 1 was not significantly different from 0. In contrast, the time shift was  
518 significantly different from zero for all SOAs when calculated relative to time 2, and it was  
519 numerically similar to the respective SOA. These results are consistent with the time  
520 reconstruction hypothesis, but not with the stimulus switch hypothesis. This pattern was similar  
521 across all participants as demonstrated by the differences in time shift between time 2 and time  
522 1 (right panel). Data are visualized with raincloud plots (Allen et al., 2019) displaying probability  
523 density estimates, condition averages (large symbols), and individual participants (small  
524 symbols). Error bars denote 95% confidence intervals.

525 A linear mixed model with factors SOA and Reference Time Point  
526 (localization errors for correct TOJ trials computed relative to time 1 vs. time 2)  
527 and time shift of the error curve between correct and incorrect TOJ trials as  
528 dependent variable revealed a significant main effect of Reference Time Point  
529 ( $\chi^2(9,10) = 21.33, p < 0.001$ ) and a significant Reference Time Point  $\times$  SOA  
530 interaction ( $\chi^2(7,10) = 9.90, p = 0.02$ ). The time shift between localization errors  
531 for correct TOJ trials at time 1 and incorrect TOJ trials, averaged across all four  
532 SOA conditions, was 8 ms. As in Experiment 1, a LMM with a common intercept  
533 for all SOAs did not fit the data better than a model without an intercept ( $\chi^2(1)$   
534 = 1.24,  $p = 0.27$ ). Similarly, allowing for individual intercepts per SOA did not  
535 improve the goodness of fit, ( $\chi^2(3) = 2.74, p = 0.43$ ). Thus, none of the tested  
536 models provided statistical evidence to reject a zero time shift with respect to  
537 time 1. These results were again supported by parameter estimates of  
538 Bayesian models equivalent to the afore-mentioned LMMs, which estimated  
539 both an intercept across all SOAs and individual intercepts per SOA to lie in

540 intervals that included 0 (see Supplementary Information). Model comparison  
541 via leave-one-out cross-validation found a model without population intercept  
542 to be more credible than a model with a common intercept (difference of  
543 expected log predictive density, ELPD: -0.2, s.e. 0.6) and a model with  
544 individual intercepts per SOA (ELPD: -2.2, s.e. 2.2).

545 In contrast, the average time shifts between localization errors for correct  
546 TOJ trials at time 2 and incorrect TOJ trials were -52 (s.e., 12) ms, -75 (s.e.,  
547 12) ms, -87 (s.e., 14) ms, and -104 (s.e., 13) ms for the SOA 60 ms, 85 ms, 110  
548 ms, and 135 ms, respectively. A model with a common intercept for all SOAs  
549 explained the data significantly better than a model without an intercept ( $\chi^2(1)$   
550 = 29.27,  $p < 0.001$ ). A model allowing for different intercepts for each SOA  
551 further improved the goodness of fit ( $\chi^2(3) = 14.3$ ,  $p = 0.003$ ), indicating that  
552 localization curve's time shift relative to time 2 depended on the respective SOA  
553 (see Supplementary Table 5 for Bayesian model estimates). Model comparison  
554 via leave-one-out cross-validation found a model with individual SOA intercepts  
555 to be more credible than a model with a common intercept (difference of  
556 expected log predictive density, ELPD: -5.4, s.e. 3.8) and a model without  
557 intercept (ELPD: -7.2, s.e. 4.7).

558 In sum, localization curves reflected the increase of, and shift values  
559 were numerically close to, the stimulus SOAs. Yet, the time shift value for the  
560 110 ms SOA in Experiment 2 was smaller than that of Experiment 1 (-87 vs. -  
561 105 ms). In fact, average time shift values of Experiment 2 seemed to  
562 underestimate the true SOA in Experiment 2, although the Bayesian 95%  
563 intervals of the intercept estimates included the true SOA for all but the largest  
564 SOA (i.e., 135 ms, see Supplementary Table 5). Furthermore, at time 1, the  
565 estimated intercepts were all slightly (albeit non-significantly) positive (Fig. 8 left  
566 panel, Supplementary Table 5), and when one considers the difference in time  
567 shift (i.e., Time 2 – Time 1), the estimated values match the true SOA more  
568 closely (-63 ms, -81 ms, -88 ms, and -120 ms for SOAs 60 ms, 85 ms, 110 ms,  
569 and 135 ms, respectively; see Fig. 8, right panel). We note that time shift  
570 calculations are based on a sliding Gaussian average across noisy, non-linear

571 patterns of localization errors, and so absolute shift values may not exactly  
572 reflect the stimulus SOAs.

## 573 **Discussion**

574         The aim of our study was to test whether participants represent the  
575 remapped spatial location of tactile stimuli when they make spatial decisions  
576 about tactile stimuli. Participants indicated both the target limb and the  
577 perceived location in space of the first of two tactile stimuli in a tactile TOJ task.  
578 Presentation of stimuli during movement implied that stimulus location  
579 depended on stimulation time, allowing us to determine the relationship of  
580 stimulus timing and perceived stimulus location in space. If participants had first  
581 computed the spatial location, and then derived which limb had occupied this  
582 location at time of stimulation (space-to-limb hypothesis, see Kitazawa, 2002),  
583 incorrect hand assignment should have been associated with external  
584 localization along the trajectory of the correct hand; we did not find any  
585 evidence for such behavior. If participants had represented stimulus location  
586 and stimulated limb together, and simply confused the two due to conflict  
587 between different spatial codes (*stimulus switch hypothesis*), incorrect hand  
588 assignment should have been associated with spatial localization at the location  
589 of the incorrect limb at the second stimulus's time. Localization error curves  
590 were incompatible with this view, as their systematic bias differed significantly  
591 from a hypothetical localization curve, derived from correct trials, relating to  
592 stimulus time 2. Instead, when participants chose the incorrect hand, their  
593 localization errors implied that they had aimed at that hand's location at the time  
594 of the first, correct stimulus, evident in a close match of localization curves of  
595 correct and erroneous TOJ trials when computed relative to stimulus time 1. In  
596 other words, participants derived the reported stimulus location by combining  
597 the time of the first, correct stimulus with the trajectory of the second, incorrectly  
598 chosen hand, effectively indicating a location at which no stimulus had occurred  
599 – consistent with the *time reconstruction hypothesis*. This behavior was evident  
600 for all combinations of uncrossed and crossed start and end postures, as well  
601 as for all tested SOAs between the two tactile stimuli. TOJ errors, thus, did not



602 simply reflect temporal confusion of two stimuli; instead, localization in TOJ  
603 error trials marks the computation of tactile stimulus location based on correct  
604 stimulus timing and movement information of a (correctly or incorrectly) implied  
605 body part. Accordingly, limb crossing affected hand assignment, but not  
606 stimulus localization.

607 The pattern of hand assignment errors was in line with previous studies:  
608 Participants made more TOJ hand assignment errors in conditions that involved  
609 hand crossing than in conditions in which the hands were uncrossed (see Fig.  
610 3; Heed, Möller, et al., 2015; Hermosillo et al., 2011; Shore et al., 2002;  
611 Yamamoto & Kitazawa, 2001). These reliable findings support the interpretation  
612 that categorical decisions in touch, such as choosing which limb was  
613 stimulated, are affected by weighted integration of different spatial aspects of  
614 the tactile stimulus and configuration of the body (Badde et al., 2019; Badde &  
615 Heed, 2016; Heed & Azañón, 2014). In contrast, localization error patterns were  
616 similar across uncrossed and crossed start and end hand posture conditions,  
617 suggesting that arm posture during stimulation did not affect localization  
618 responses (see Fig. 4, 5). In particular, localization errors exhibited comparable  
619 spatial biases over time in uncrossed and crossed conditions. Furthermore,  
620 localization error scattered around the chosen hand was not biased towards the  
621 other hand (see Fig. 4), an effect one might have expected if, like hand  
622 assignment, spatial localization was subject to weighted influence of the tactile  
623 stimulus's anatomical origin as coded by a body-based reference frame.

624 The dissociation between TOJ hand assignment and localization  
625 responses indicates that the two phenomena do not reflect the same process.  
626 It is widely assumed that the weighted integration of spatial factors reflected by  
627 tactile limb crossing effects trades off the anatomical and the external location  
628 of a tactile stimulus (Badde & Heed, 2016; Cadieux & Shore, 2013; Kitazawa,  
629 2002; Shore et al., 2002; Yamamoto & Kitazawa, 2001). This assumption  
630 requires that an external location is constructed as a prerequisite for assigning  
631 a stimulus to a hand. Our present finding that participants incorrectly localize  
632 tactile stimuli associated with incorrect limb choice, in contrast, implies that not

633 stimulus location determines hand assignment, but vice versa, hand  
634 assignment determines perceived stimulus location.

635         This conclusion is incompatible with the common view that crossing  
636 effects, obtained in experiments that require categorical decisions such as TOJ,  
637 are an implicit indicator of precise tactile localization and tactile remapping. This  
638 is a strong claim that may invalidate the experimental logic of numerous papers  
639 that have applied this logic. However, the present results are corroborated by  
640 another recent study that has challenged the view that errors in tactile  
641 categorical response paradigms reflect a conflict between anatomical and  
642 external spatial coordinates. In that study, participants performed TOJ of tactile  
643 stimuli presented to uncrossed and crossed hands and feet (Badde et al.,  
644 2019). In each trial, two stimuli were randomly presented to two of the four  
645 limbs. In some trials, participants reported the first touch on a limb that had not  
646 been stimulated in this trial. For instance, after stimulation of the left hand and  
647 the right foot, a participant may have indicated that the first stimulus had  
648 occurred on the right hand. These TOJ errors systematically depended on  
649 different anatomical features such as the type (hand or foot) of the correct limb  
650 and its body side. Critically, neither the side of space of the limb that had  
651 received the correct stimulus, nor the spatial distance between stimulus and  
652 response limb affected TOJ errors in this task. Like the present results, these  
653 findings are incompatible with the prevailing view that crossing effects reflect  
654 conflict during the integration of anatomical and spatial stimulus location. In fact,  
655 the two studies complement each other in that we show here that stimulus  
656 location is not used for hand assignment, and Badde et al. (2019) suggest  
657 which information is instead used to choose between the two hands in a  
658 categorical tactile-spatial task.

659         Notably, other manipulations that have been used to argue for the  
660 relevance of precise spatial representations in tactile decisions can be framed  
661 in such a feature-based account as well. For instance, the TOJ crossing effect  
662 was reduced when the two hands' positions differed in height or in depth  
663 (Azañón et al., 2016). However, this manipulation may have simply introduced

664 an additional, non-metric feature that helped representing the two choice  
665 options as different, thus improving TOJ choice based on a categorical feature  
666 rather than on metric distance. Similarly, whereas effects of distance between  
667 the two hands during a TOJ have been interpreted as implying a metric  
668 representation of stimulus location (Roberts et al., 2003; Shore et al., 2005),  
669 others have reported such effects only for very small (3cm), but not other (10  
670 cm and larger), distances between the hands (Kim & Cruse, 2001), again  
671 suggesting that they may reflect categorically coded spatial features, not metric  
672 stimulus location.

673         The reason for the apparent contradiction between previous research  
674 and these new findings stems from the fact that typical experimental designs,  
675 in which tactile stimuli are presented to the two stationary hands, do not allow  
676 disentangling the prevailing view of crossing effects indicating conflict between  
677 tactile anatomical and (precise) spatial stimulus location from the view that the  
678 conflict apparent in limb crossing must indicate other spatial aspects, such as  
679 those identified in our previous study (Badde et al., 2019). Thus, limb crossing  
680 paradigms that require limb choices about the origin of touch likely reflect the  
681 integration of categorical, tactile-spatial stimulus features. We propose that  
682 automatic effects, such as crossmodal, tactile-visual cueing (Azañón & Soto-  
683 Faraco, 2008), too, are based on such feature-based processing. In contrast,  
684 precise stimulus location is, contrary to what has regularly been implied, not  
685 among the pieces of information that are integrated for automatic, tactile-spatial  
686 coding. Instead, precise location of the tactile stimulus in space is inferred post-  
687 hoc only when required.

688         Furthermore, our proposal contrasts with the suggestion that TOJ errors  
689 are due to temporal confusion of the two stimuli, hypothesized to occur due to  
690 slowing of a neural clock mechanism because crossed postures induce higher  
691 cognitive load as compared to uncrossed postures (Kitazawa et al., 2008). This  
692 hypothesis is based on the assumption that tactile locations are represented  
693 correctly but ordered incorrectly in time. It is incompatible with our finding that  
694 participants localized touch in incorrect TOJ trials at the location of the incorrect

695 hand at the correct, first stimulus time point. Moreover, an account based on  
696 time confusion is specific to the TOJ paradigm, in which participants compare  
697 two stimuli. In contrast, a feature-based account generalizes to other  
698 experimental paradigms, including ones that present only a single tactile  
699 stimulus (Azañón et al., 2010; Azañón & Soto-Faraco, 2008; Badde et al., 2015,  
700 2019).

701 Our study exploited systematic localization errors when a stimulus is  
702 presented during a movement of the arm. A modulation of spatial localization  
703 by movement of the respective sensors is not unique to touch. When a brief  
704 flash is shown during a smooth pursuit or saccadic eye movement, its  
705 localization is perceived with a bias in the direction of the eye movement shortly  
706 before and during the first half of the eye movement, and in the opposite  
707 direction at the end of the eye movement (Matin & Pearce, 1965; reviewed by  
708 Schlag & Schlag-Rey, 2002). As suggested here for touch, visual  
709 mislocalization during saccades, too, depends on temporal processing. For  
710 instance, irrelevant auditory temporal information can influence the perceived  
711 location of a flash near the time of saccades and result in a temporal shift of the  
712 visual localization error curve (Binda et al., 2010; Maij et al., 2009). Moreover,  
713 when a red flash was presented around the time of a saccade on a split  
714 green/red background, participants sometimes reported that the red flash had  
715 occurred on the (same-color) red background; these reports of an objectively  
716 impossible perception (flash on same-colored background) were best explained  
717 by integration of temporal uncertainty of the flash's timing and eye position  
718 (Maij, Brenner, et al., 2011). A computational model for these temporal-spatial  
719 phenomena faithfully replicates the observed spatial biases for both vision and  
720 touch. Illustrated for the case of tactile localization on the arm, the model  
721 assumes temporal uncertainty about tactile stimulus occurrence relative to the  
722 arm movement and combines a probability distribution of the possible stimulus  
723 time with the perceived arm movement trajectory (Maij et al., 2013, 2017; see  
724 Maij, Grave, et al., 2011, for the visual analogue). The present results, too, are  
725 compatible with the temporal uncertainty model. Independent of which hand the  
726 stimulus was assigned to, the temporal estimate of the tactile stimulus was

727 identical, resulting in identical localization error profiles, based on the trajectory  
728 of the chosen hand, in correct and incorrect TOJ trials. Thus, the time-based  
729 mechanism that leads to the seemingly surprising perception of spatial  
730 locations at which no stimulus really occurred may be task- and domain-  
731 general.

732 To summarize, we observed the typical dependence of tactile TOJ  
733 responses on limb posture, with higher error rates when the hands are crossed  
734 rather than uncrossed. Explicit localization responses of the stimulus chosen  
735 as having occurred first were incompatible with theoretical accounts that posit  
736 confusion of yoked stimulus representations that encompass the independently  
737 determined external-spatial location of tactile stimuli, or projection of a body  
738 part onto the determined spatial location of a stimulus. Instead, participants  
739 chose one hand presumably based on categorical, spatial stimulus  
740 characteristics such as the stimulated body side (Badde et al., 2019), and then  
741 combined the time point associated with the first stimulus with the chosen arm's  
742 trajectory. After hand assignment errors, participants, thus, effectively  
743 referenced a post-hoc constructed spatial location at which no stimulus had  
744 ever occurred.

## 745 **Materials & methods**

746 Data for the presented analyses as well as code to run analyses and create  
747 figures are provided at the Open Science Framework website,  
748 <https://osf.io/ybxn5/>.

## 749 **Participants**

750 Experiment 1 was performed at the Faculty of Psychology and Human  
751 Movement Science of the University of Hamburg. Twelve right-handed  
752 participants (aged 19-31 years, 7 female) gave informed consent to take part in  
753 the experiment. The study was part of a research program approved by the  
754 ethics committee of the German Psychological Society (DGPs). Experiment 2  
755 was preregistered at the Open Science Framework website

756 (<https://osf.io/qyzgb>). A sample size of 20 participants was defined a priori. We  
757 collected data from 20 individuals from Bielefeld University. We excluded data  
758 of 1 participant from analyses as s/he did not follow the instructions and most  
759 of the time localized the tactile stimulus at the start or end position, but not along  
760 the movement trajectory. Furthermore, we excluded data of another participant  
761 as s/he only completed 384 trials in total. As any form of data acquisition was  
762 stopped in our lab beginning of March 2020 due to the spread of the corona  
763 virus, we did not collect data from replacement participants. Our sample thus  
764 consisted of 18 participants (aged 18-25 years, 15 female). The experiment  
765 was approved by the ethics committee at Bielefeld University (Ethical  
766 Application Ref: 2017-114).

767 Participants provided written informed consent and were compensated with  
768 €7/hr or received course credit. All participants had normal or corrected-to-  
769 normal vision and did not have any known perceptual, motor, or neurological  
770 disorders. Participants took part only if, in a screening experiment, they  
771 exhibited a TOJ crossing effect at the SOA used in the main experiment. We  
772 used this screening procedure because individual response patterns in tactile  
773 experiments involving hand crossing are quite variable (Badde et al., 2015;  
774 Cadieux et al., 2010; Yamamoto & Kitazawa, 2001); however, crossing effects  
775 are highly reliable across the entire population, so that our screening procedure  
776 does not preclude generalization.

### 777 **General setup**

778 Participants were blindfolded. They sat on a chair at a table. A tactile stimulator  
779 (Oticon BC 461-0/12, Oticon Ltd., London, UK) was attached to the phalanx  
780 media of each index finger. Stimulation consisted of 200 Hz vibration for 10 ms.  
781 To mask any noise of the vibrators, participants wore earplugs and heard white  
782 noise through speakers (Experiment 1) or wore sound-attenuating headphones  
783 (Superlux HD669, Superlux Enterprise Development, Shanghai, China;  
784 Experiment 2).

785

## 786 **Experiment 1**

### 787 ***Apparatus, task and procedure***

788 The position of each index finger in space was recorded with an Optotrak active,  
789 infrared marker motion tracking system (Northern Digital Inc., Waterloo,  
790 Ontario, Canada) at a sampling rate of 1000 Hz. One marker was positioned  
791 on the nail of each index finger, directly next to the tactile stimulator. A data  
792 acquisition unit (Oda; Northern Digital Inc., Waterloo, Ontario, Canada;  
793 sampling rate 1000 Hz) synchronized marker position and timing of the tactile  
794 stimuli. The experiment was controlled with Matlab (Mathworks, Natick, MA,  
795 USA), using the Psychophysics Toolbox (Brainard, 1997) and the Optotrak  
796 Toolbox (<http://webapp6.rz.uni-hamburg.de/allpsy/vf/OptotrakToolbox>).

797 *2 Stimulus Task:* Participants moved both hands from a position of about 40 cm  
798 away from their body towards their body to a position about 10 cm away from  
799 their body. Hand start and end posture were uncrossed and crossed, varied in  
800 blocks of 50 trials in pseudo-randomized order (see Fig. 1A). In each trial, a  
801 tone instructed the movement start. At a random time (presented between 50-  
802 800 ms after the tone, drawn from a square distribution) before, during, or after  
803 the movement, two tactile stimuli were applied, one to each hand, at an SOA of  
804 110 ms; the left-right order of stimuli was pseudo-random. Upon movement  
805 completion, participants moved the index finger that they had perceived to have  
806 been stimulated first to the location of the first stimulus on the table. The hand  
807 remained in this location until a tone, presented 2.5 s after the initial movement  
808 cue instructed them to lift the index finger; this finger lift was used to identify the  
809 response hand during trajectory analysis. Subsequently, participants  
810 repositioned the hands to their start locations. We acquired 300 trials of each  
811 posture combination. To compensate for obstruction of motion tracking  
812 markers, we acquired more trials for 2 participants in the uncrossed to crossed  
813 posture and vice versa movement condition. The experiment took  
814 approximately 4 hours, split in two-hour sessions held on different days.  
815 Practice trials were included on each day before the experiment started until

816 the participant had understood, and felt confident with, the task. In total we  
817 acquired 14.776 trials.

818 *1 Stimulus Task*: The procedure was identical to the 2 Stimulus task except that  
819 participants only received one stimulus at either hand and then indicated the  
820 perceived location with the respective index finger. Participants performed 300  
821 trials in each posture combination split in blocks of 50 trials. In 99,5% of the  
822 trials participants were using the correct arm when localizing the stimulus.

### 823 **Analysis**

824 *Data preprocessing*. Start and end of the movement were determined based on  
825 a velocity threshold of 5 cm/s. We interpolated missing motion tracking data,  
826 for instance due to obstruction when the hands passed each other or due to  
827 rotation of the hands, using splines, with the restriction that movement onset  
828 and offset could be determined. Trials were discarded when (1) missing marker  
829 data could not be adequately interpolated (1 Stimulus Task: 13%; 2 Stimulus  
830 Task: 11.9%); (2) no stimulus localization response, indicated by finger lifting,  
831 could be detected (1 Stimulus Task: 2.8%; 2 Stimulus Task: 5.4%); (3) and  
832 when participants did not perform smooth, continuous, and synchronous  
833 movements with movement duration less than 200 ms or more 1000 ms (1  
834 Stimulus Task: 3.7%; 2 Stimulus Task: 0.2%). In total, 19% (1 Stimulus Task)  
835 and 17.5% (2 Stimulus Task) of trials were removed.

836 *Analysis of Temporal Order Judgements (TOJ)*. We considered the TOJ to be  
837 correct when the hand used for the localization response had indeed been  
838 stimulated first.

839 *Localization error*. We calculated the localization error, that is, the difference  
840 between the true location of the index finger at the time of stimulation and the  
841 reported location, that is, index finger pointing location just before finger lifting.  
842 Errors are reported relative to the direction of the movement as a straight line  
843 between start and end position of the hand, with positive values indicating  
844 errors in movement direction towards the end position of the hand. The  
845 localization error varies systematically with the stimulus time relative to



846 movement onset (Dassonville, 1995; Maij et al., 2013, 2017; Maij, Grave, et al.,  
847 2011; Watanabe et al., 2009). The localization errors were converted to an  
848 estimated localization curve by averaging errors using a moving Gaussian  
849 window of 75 ms across a time window of -200 to 600 ms (step size 1ms) with  
850 respect to movement onset. For each participant and posture condition, we  
851 calculated localization curves for correct TOJ trials relative to onset of the first  
852 stimulus, for correct TOJ trials relative to onset of the second stimulus, and for  
853 incorrect TOJ trials relative to onset of the first stimulus.

854 *Comparison of localization errors in correct and incorrect TOJ trials.* To  
855 determine whether participants localized the stimulus relative to hand position  
856 at the first or the second stimulus timepoint, we calculated – separately for each  
857 participant and posture condition – the temporal shift that would produce the  
858 smallest deviations around a single, common localization curve of the  
859 compared conditions 1) between the incorrect TOJ localization curve and the  
860 correct TOJ localization curve relative to the first stimulus time point and 2)  
861 between the incorrect TOJ localization curve and the correct TOJ localization  
862 curve relative to the second stimulus time point. Specifically, we shifted the data  
863 points of the incorrect TOJ localization curves in time from 300 – 300 ms in  
864 steps of 1 ms and calculated the squared localization error differences with an  
865 localization curve calculated from data points of the two compared conditions  
866 using a common moving Gaussian average for each time shift. We refer to the  
867 time value that minimized the summed squared error differences with this  
868 overall construction curve as time shift (Maij et al., 2009, 2017).

869 We assessed the time shift for both stimulus times and, accordingly, obtained  
870 two shift values per participant and posture condition. In some instances, we  
871 were unable to construct a time shift due to a low number of incorrect TOJ trials  
872 for that specific condition (18 cases out of 4 postures x 2 stimulus times x 12  
873 participants = 96); these data points were treated as missing data in the linear  
874 mixed model analysis.

875 *Statistical analysis.* We assessed statistical significance of the reported  
876 results using (Generalized) Linear Mixed Models ([G]LMM) (Bolker et al., 2009,

877 2009) as implemented in R version 3.6.1 (R Core Team, 2014) using packages  
878 lme4, version 1.1-21 (Bates et al., 2015), and afex version 0.26-0 (Singmann,  
879 2015). We estimated intercept parameters of Bayesian mixed factorial models  
880 equivalent to LMM using packages brms, version 2.12.0 (Bürkner, 2017, 2018),  
881 and loo, version 2.2.0 (Vehtari, Gabry, et al., 2017; Vehtari, Gelman, et al.,  
882 2017).

883 GLMM are adequate for analysis of binary variables such as correct vs.  
884 incorrect responses in our TOJ task (Jaeger, 2008). Furthermore, (G)LMM and  
885 are robust against missing data and account for differences in trial numbers  
886 across conditions, as present in our data. All reported statistics were computed  
887 using type 3 sums of squares, as implemented in afex. For the random structure  
888 of LMM and GLMM for TOJ analysis, we included only random intercepts,  
889 because models did not reliably converge when random slopes were included.  
890 Models that tested time shifts against zero used only the data corresponding to  
891 one particular reference time point of correct trials (localization error relative to  
892 time 1 or time 2); given that posture did not significantly modulate time shift, the  
893 respective models excluded this factor. Accordingly, we compared a model  
894 without intercept [shift ~ 0 + (1 | participant)] against a model with intercept [shift  
895 ~ 1 + (1 | participant)], effectively testing whether a non-zero intercept  
896 significantly improved the time shift fit.

897 The brms R package uses STAN as backend. We ran LMM to estimate  
898 the 95% interval of the intercepts in the different time shift models. We  
899 compared Bayesian models using the loo\_compare() function of the loo R  
900 package. This function uses leave-one-out cross-validation to compare models  
901 by assessing the models' predictive density when each data point is omitted  
902 from fitting (Vehtari, Gelman, et al., 2017).

## 903 **Experiment 2**

### 904 ***Apparatus, task and procedure***

905 Kinematic data of the fingers was recorded using an optical motion capture  
906 system (Visualeyez II VZ4000v, Phoenix Technologies Inc, Vancouver, BC,

907 Canada) at 250Hz sampling frequency with markers placed on the nail of the  
908 two index fingers. The experiment was controlled with Matlab (The MathWorks  
909 Version R2015a; Natick, MA, USA) using the Psychophysics Toolbox  
910 (Brainard, 1997). Stimulus presentation was controlled via custom-made  
911 hardware and triggered through a digital acquisition card (PCI-6509, National  
912 Instruments, Austin, USA).

913 The procedure was largely similar to Experiment 1, except that 1) participants  
914 made only reaches from an uncrossed to an uncrossed posture or from a  
915 crossed to a crossed posture and 2) tactile stimuli were separated by SOAs of  
916 60, 85, 110, or 135 ms. Posture was varied in blocks of 64 trials in a pseudo-  
917 randomized order. Within each block, SOA and which hand was stimulated first  
918 were pseudo-randomized. Participants performed 28 blocks (14 of each  
919 posture combination) for a total of 1792 trials. To compensate for marker  
920 obstruction and failure to reliably detect finger lifting, 2 participants performed  
921 10 additional blocks (5 of each posture combination). As we stopped any form  
922 of data acquisition in our lab for an indefinite time period beginning of March  
923 2020, 2 participants performed only 19 and 23 blocks, respectively. The  
924 experiment took about 5-6 hours to complete, split in two-hour sessions held  
925 on different days. Practice trials were included prior to each experimental  
926 session.

## 927 **Analysis**

928 *Data preprocessing.* We used custom-written Matlab scripts for processing of  
929 kinematic data. We first interpolated missing data points and resampled the  
930 data to 1000 Hz using splines, and low-pass filtered the data using a second-  
931 order butterworth filter with a cut-off frequency of 6 Hz. We determined  
932 movement onset/ offset of each hand as the time of the sample in which the  
933 resultant velocity of the respective finger marker exceeded/ dropped below 5  
934 cm/s. We excluded trials when missing marker data could not be adequately  
935 interpolated (8%), when no stimulus localization response, indicated by finger  
936 lifting, could be detected (4.2%), and when participants did not perform smooth,

937 continuous, and synchronous movements (6.8%). In total we removed 18.2%  
938 of the trials.

939 *Analysis of Temporal Order Judgements (TOJ) and localization error.* TOJ and  
940 localization errors were determined as in Experiment 1. Because localization  
941 error curves were similar regardless of start and end posture in Experiment 1,  
942 we collapsed across postures in Experiment 2 to calculate the localization error  
943 curves; we calculated individual curves for each participant and SOA (60, 85,  
944 110, and 135 ms). Localization error curves calculated separately for  
945 Experiment 2's two posture conditions yielded qualitatively similar results (see  
946 Supplementary Information).

947 *Comparison of localization errors in correct and incorrect TOJ trials.* Time shift  
948 values were calculated as in Experiment 1 (separately for each participant and  
949 SOA) using a shifting window of -300 to 300 ms (step size 1ms).

950 *Statistical analysis.* We assessed TOJ performance using a generalized mixed  
951 model (GLMM) with factors Posture (uncrossed-uncrossed, crossed-crossed),  
952 and SOA (60, 85, 110, 135 ms). The analysis approach for the dependence of  
953 time shifts on SOAs followed a similar logic as Experiment 1. We first assessed  
954 the significance of main effects and interaction of the experimental design with  
955 afex. We then assessed whether time shifts were 0 relative to time 1 and time  
956 2. To this end, we compared models with a random participant factor but no  
957 fixed factors and intercept [shift ~ 0 + (1 | participant)], with a common intercept  
958 for all SOAs [shift ~ 1 + (1 | participant)], and with individual intercepts per SOA  
959 [shift ~ SOA + (1 | participant)] separately for shift values relative to time 1 and  
960 time 2, respectively.

## 961 **Acknowledgements**

962 We thank Maie Stein, Franziska Rudzik, and Nina Held for help with data  
963 acquisition, Volker Franz, Rainer Schäfer, and Renate Kiesewalter for their help  
964 with the Optotrak and ODAU setup, Conrad Alting for help with programming of  
965 Experiment 2, and Mathieu G.M. Koppen for help with LMM analysis. FM was

966 supported by the Netherlands Organization for Scientific Research (NWO Veni  
967 Grant 451-12-009). TH was supported by an Emmy Noether grant of the  
968 German Research Foundation (DFG) (He 6368/1-1). WPM received support  
969 from the European Research Council (EU-ERC-283567) and the Netherlands  
970 Organization for Scientific Research (NWO-VICI: 453-11-001). Data and code  
971 for the present paper are available at the Open Science Framework website,  
972 <https://osf.io/ybxn5/>.

## 973 **References**

- 974 Allen, M., Poggiali, D., Whitaker, K., Marshall, T. R., & Kievit, R. A. (2019).  
975 Raincloud plots: A multi-platform tool for robust data visualization.  
976 *Wellcome Open Research*, 4, 63.  
977 <https://doi.org/10.12688/wellcomeopenres.15191.1>
- 978 Alsmith, A. J. T., Ferrè, E. R., & Longo, M. R. (2017). Dissociating  
979 contributions of head and torso to spatial reference frames: The  
980 misalignment paradigm. *Consciousness and Cognition*, 53, 105–114.  
981 <https://doi.org/10.1016/j.concog.2017.06.005>
- 982 Angelaki, D. E., Gu, Y., & DeAngelis, G. C. (2009). Multisensory integration:  
983 Psychophysics, neurophysiology, and computation. *Current Opinion in*  
984 *Neurobiology*, 19(4), 452–458.  
985 <https://doi.org/10.1016/j.conb.2009.06.008>
- 986 Atsma, J., Maij, F., Koppen, M., Irwin, D. E., & Medendorp, W. P. (2016).  
987 Causal Inference for Spatial Constancy across Saccades. *PLOS*  
988 *Computational Biology*, 12(3), e1004766.  
989 <https://doi.org/10.1371/journal.pcbi.1004766>
- 990 Azañón, E., Camacho, K., & Soto-Faraco, S. (2010). Tactile remapping  
991 beyond space. *European Journal of Neuroscience*, 31(10), 1858–1867.  
992 <https://doi.org/10.1111/j.1460-9568.2010.07233.x>
- 993 Azañón, E., Mihaljevic, K., & Longo, M. R. (2016). A three-dimensional spatial  
994 characterization of the crossed-hands deficit. *Cognition*, 157, 289–295.  
995 <https://doi.org/10.1016/j.cognition.2016.09.007>
- 996 Azañón, E., & Soto-Faraco, S. (2008). Changing reference frames during the  
997 encoding of tactile events. *Current Biology*, 18(14), 1044–1049.  
998 <https://doi.org/10.1016/j.cub.2008.06.045>
- 999 Azañón, E., Stenner, M.-P., Cardini, F., & Haggard, P. (2015). Dynamic  
1000 Tuning of Tactile Localization to Body Posture. *Current Biology*, 25(4),  
1001 512–517. <https://doi.org/10.1016/j.cub.2014.12.038>
- 1002 Badde, S., & Heed, T. (2016). Towards explaining spatial touch perception:  
1003 Weighted integration of multiple location codes. *Cognitive*  
1004 *Neuropsychology*, 33(1–2), 1–22.  
1005 <https://doi.org/10.1080/02643294.2016.1168791>
- 1006 Badde, S., Heed, T., & Röder, B. (2014). Processing load impairs coordinate  
1007 integration for the localization of touch. *Attention, Perception, &*  
1008 *Psychophysics*, 76(4), 1136–1150. [https://doi.org/10.3758/s13414-013-](https://doi.org/10.3758/s13414-013-0590-2)  
1009 0590-2
- 1010 Badde, S., Heed, T., & Röder, B. (2015). Integration of anatomical and  
1011 external response mappings explains crossing effects in tactile  
1012 localization: A probabilistic modeling approach. *Psychonomic Bulletin &*  
1013 *Review*, 23(2), 387–404. <https://doi.org/10.3758/s13423-015-0918-0>

- 1014 Badde, S., Röder, B., & Heed, T. (2019). Feeling a Touch to the Hand on the  
1015 Foot. *Current Biology*, *29*(9), 1491-1497.e4.  
1016 <https://doi.org/10.1016/j.cub.2019.02.060>
- 1017 Bates, D., Mächler, M., Bolker, B., & Walker, S. (2015). Fitting Linear Mixed-  
1018 Effects Models Using lme4. *Journal of Statistical Software*, *67*(1).  
1019 <https://doi.org/10.18637/jss.v067.i01>
- 1020 Bernier, P.-M., & Grafton, S. T. (2010). Human posterior parietal cortex  
1021 flexibly determines reference frames for reaching based on sensory  
1022 context. *Neuron*, *68*(4), 776–788.  
1023 <https://doi.org/10.1016/j.neuron.2010.11.002>
- 1024 Binda, P., Morrone, M. C., & Burr, D. C. (2010). Temporal auditory capture  
1025 does not affect the time course of saccadic mislocalization of visual  
1026 stimuli. *Journal of Vision*, *10*(2), 7–7. <https://doi.org/10.1167/10.2.7>
- 1027 Bolker, B. M., Brooks, M. E., Clark, C. J., Geange, S. W., Poulsen, J. R.,  
1028 Stevens, M. H. H., & White, J.-S. S. (2009). Generalized linear mixed  
1029 models: A practical guide for ecology and evolution. *Trends in Ecology  
1030 & Evolution*, *24*(3), 127–135. <https://doi.org/10.1016/j.tree.2008.10.008>
- 1031 Brainard, D. H. (1997). The Psychophysics Toolbox. *Spatial Vision*, *10*(4),  
1032 433–436. <https://doi.org/10.1163/156856897X00357>
- 1033 Bürkner, P.-C. (2017). brms: An R Package for Bayesian Multilevel Models  
1034 Using Stan. *Journal of Statistical Software*, *80*(1), 1–28.  
1035 <https://doi.org/10.18637/jss.v080.i01>
- 1036 Bürkner, P.-C. (2018). Advanced Bayesian Multilevel Modeling with the R  
1037 Package brms. *The R Journal*, *10*(1), 395–411.
- 1038 Cadieux, M. L., Barnett-Cowan, M., & Shore, D. I. (2010). Crossing the hands  
1039 is more confusing for females than males. *Experimental Brain  
1040 Research*, *204*(3), 431–446. <https://doi.org/10.1007/s00221-010-2268-5>  
1041 5
- 1042 Cadieux, M. L., & Shore, D. I. (2013). Response Demands and Blindfolding in  
1043 the Crossed-Hands Deficit: An Exploration of Reference Frame  
1044 Conflict. *Multisensory Research*, *26*(5), 465–482.  
1045 <https://doi.org/10.1163/22134808-00002423>
- 1046 Dassonville, P. (1995). Haptic localization and the internal representation of  
1047 the hand in space. *Experimental Brain Research*, *106*(3), 434–448.
- 1048 Ernst, M. O., & Banks, M. S. (2002). Humans integrate visual and haptic  
1049 information in a statistically optimal fashion. *Nature*, *415*(6870), 429–  
1050 433. <https://doi.org/10.1038/415429a>
- 1051 Ernst, M. O., & Di Luca, M. (2011). Multisensory perception: From integration  
1052 to remapping. In *Sensory cue integration* (pp. 224–250). Oxford  
1053 University Press, Oxford.
- 1054 Fiehler, K., Schütz, I., & Henriques, D. Y. P. (2011). Gaze-centered spatial  
1055 updating of reach targets across different memory delays. *Vision  
1056 Research*, *51*(8), 890–897. <https://doi.org/10.1016/j.visres.2010.12.015>

- 1057 Gallace, A., & Spence, C. (2005). Visual capture of apparent limb position  
1058 influences tactile temporal order judgments. *Neuroscience Letters*,  
1059 379(1), 63–68. <https://doi.org/10.1016/j.neulet.2004.12.052>
- 1060 Harrar, V., & Harris, L. R. (2010). Touch used to guide action is partially  
1061 coded in a visual reference frame. *Experimental Brain Research*,  
1062 203(3), 615–620. <https://doi.org/10.1007/s00221-010-2252-0>
- 1063 Heed, T., & Azañón, E. (2014). Using time to investigate space: A review of  
1064 tactile temporal order judgments as a window onto spatial processing  
1065 in touch. *Frontiers in Psychology*, 5, 76.  
1066 <https://doi.org/10.3389/fpsyg.2014.00076>
- 1067 Heed, T., Backhaus, J., Röder, B., & Badde, S. (2016). Disentangling the  
1068 External Reference Frames Relevant to Tactile Localization. *PLOS*  
1069 *ONE*, 11(7), e0158829. <https://doi.org/10.1371/journal.pone.0158829>
- 1070 Heed, T., Buchholz, V. N., Engel, A. K., & Röder, B. (2015). Tactile  
1071 remapping: From coordinate transformation to integration in  
1072 sensorimotor processing. *Trends in Cognitive Sciences*, 19(5), 251–  
1073 258. <https://doi.org/10.1016/j.tics.2015.03.001>
- 1074 Heed, T., Möller, J., & Röder, B. (2015). Movement Induces the Use of  
1075 External Spatial Coordinates for Tactile Localization in Congenitally  
1076 Blind Humans. *Multisensory Research*, 28(1–2), 173–194.  
1077 <https://doi.org/10.1163/22134808-00002485>
- 1078 Hermosillo, R., Ritterband-Rosenbaum, A., & van Donkelaar, P. (2011).  
1079 Predicting Future Sensorimotor States Influences Current Temporal  
1080 Decision Making. *The Journal of Neuroscience*, 31(27), 10019–10022.  
1081 <https://doi.org/10.1523/JNEUROSCI.0037-11.2011>
- 1082 Jaeger, T. F. (2008). Categorical data analysis: Away from ANOVAs  
1083 (transformation or not) and towards logit mixed models. *Journal of*  
1084 *Memory and Language*, 59(4), 434–446.  
1085 <https://doi.org/10.1016/j.jml.2007.11.007>
- 1086 Kayser, C., & Shams, L. (2015). Multisensory Causal Inference in the Brain.  
1087 *PLOS Biology*, 13(2), e1002075.  
1088 <https://doi.org/10.1371/journal.pbio.1002075>
- 1089 Kim, D.-H., & Cruse, H. (2001). Two kinds of body representation are used to  
1090 control hand movements following tactile stimulation. *Experimental*  
1091 *Brain Research*, 139(1), 76–91.  
1092 <https://doi.org/10.1007/s002210100741>
- 1093 Kitazawa, S. (2002). Where conscious sensation takes place. *Consciousness*  
1094 *and Cognition*, 11(3), 475–477. [https://doi.org/10.1016/S1053-](https://doi.org/10.1016/S1053-8100(02)00031-4)  
1095 [8100\(02\)00031-4](https://doi.org/10.1016/S1053-8100(02)00031-4)
- 1096 Kitazawa, S., Moizumi, S., Okuzumi, A., Saito, F., Shibuya, S., Takahashi, T.,  
1097 Wada, M., & Yamamoto, S. (2008). Reversal of subjective temporal  
1098 order due to sensory and motor integrations. In P. Haggard, Y.



- 1099 Rossetti, & M. Kawato (Eds.), *Sensorimotor foundations of higher*  
1100 *cognition* (pp. 73–97). Oxford University Press.
- 1101 Lohmann, J., & Butz, M. V. (2017). Lost in space: Multisensory conflict yields  
1102 adaptation in spatial representations across frames of reference.  
1103 *Cognitive Processing*, 1–18. [https://doi.org/10.1007/s10339-017-0798-](https://doi.org/10.1007/s10339-017-0798-5)  
1104 5
- 1105 Maij, F., Brenner, E., & Smeets, J. B. J. (2009). Temporal Information Can  
1106 Influence Spatial Localization. *Journal of Neurophysiology*, 102(1),  
1107 490–495. <https://doi.org/10.1152/jn.91253.2008>
- 1108 Maij, F., Brenner, E., & Smeets, J. B. J. (2011). Temporal Uncertainty  
1109 Separates Flashes from Their Background during Saccades. *Journal of*  
1110 *Neuroscience*, 31(10), 3708–3711.  
1111 <https://doi.org/10.1523/JNEUROSCI.5097-10.2011>
- 1112 Maij, F., Grave, D. D. J., Brenner, E., & Smeets, J. B. J. (2011). Misjudging  
1113 where you felt a light switch in a dark room. *Experimental Brain*  
1114 *Research*, 213(2–3), 223–227. [https://doi.org/10.1007/s00221-011-](https://doi.org/10.1007/s00221-011-2680-5)  
1115 2680-5
- 1116 Maij, F., Wing, A. M., & Medendorp, W. P. (2013). Spatiotemporal integration  
1117 for tactile localization during arm movements: A probabilistic approach.  
1118 *Journal of Neurophysiology*, 110(11), 2661–2669.  
1119 <https://doi.org/10.1152/jn.00971.2012>
- 1120 Maij, F., Wing, A. M., & Medendorp, W. P. (2017). Afferent motor feedback  
1121 determines the perceived location of tactile stimuli in the external space  
1122 presented to the moving arm. *Journal of Neurophysiology*, 118(1),  
1123 187–193. <https://doi.org/10.1152/jn.00286.2016>
- 1124 Matin, L., & Pearce, D. G. (1965). Visual Perception of Direction for Stimuli  
1125 Flashed During Voluntary Saccadic Eye Movements. *Science*,  
1126 148(3676), 1485–1488. <https://doi.org/10.1126/science.148.3676.1485>
- 1127 Mueller, S., & Fiehler, K. (2014a). Gaze-dependent spatial updating of tactile  
1128 targets in a localization task. *Frontiers in Psychology*, 5, 66.  
1129 <https://doi.org/10.3389/fpsyg.2014.00066>
- 1130 Mueller, S., & Fiehler, K. (2014b). Effector movement triggers gaze-  
1131 dependent spatial coding of tactile and proprioceptive-tactile reach  
1132 targets. *Neuropsychologia*, 62, 184–193.  
1133 <https://doi.org/10.1016/j.neuropsychologia.2014.07.025>
- 1134 Penfield, W., & Boldrey, E. (1937). Somatic motor and sensory representation  
1135 in the cerebral cortex of man as studied by electrical stimulation. *Brain*,  
1136 60(4), 389–443. <https://doi.org/10.1093/brain/60.4.389>
- 1137 R Core Team. (2014). *R: A Language and Environment for Statistical*  
1138 *Computing*. R Foundation for Statistical Computing. [http://www.R-](http://www.R-project.org/)  
1139 [project.org/](http://www.R-project.org/)

- 1140 Roberts, R. D., Wing, A. M., Durkin, J., & Humphreys, G. W. (2003). Effects of  
1141 posture on tactile temporal order judgements. *Eurohaptics Conference*,  
1142 *Dublin, Ireland*, 300–304.
- 1143 Röder, B., Kusmierek, A., Spence, C., & Schicke, T. (2007). Developmental  
1144 vision determines the reference frame for the multisensory control of  
1145 action. *Proceedings of the National Academy of Sciences*, *104*(11),  
1146 4753–4758. <https://doi.org/10.1073/pnas.0607158104>
- 1147 Röder, B., Rösler, F., & Spence, C. (2004). Early vision impairs tactile  
1148 perception in the blind. *Current Biology*, *14*(2), 121–124.  
1149 <https://doi.org/10.1016/j.cub.2003.12.054>
- 1150 Roux, F., Djidjeli, I., & Durand, J. (2018). Functional architecture of the  
1151 somatosensory homunculus detected by electrostimulation. *The*  
1152 *Journal of Physiology*, *596*(5), 941–956.  
1153 <https://doi.org/10.1113/JP275243>
- 1154 Schlag, J., & Schlag-Rey, M. (2002). Through the eye, slowly; Delays and  
1155 localization errors in the visual system. *Nature Reviews Neuroscience*,  
1156 *3*(3), 191–191. <https://doi.org/10.1038/nrn750>
- 1157 Schubert, J. T. W., Badde, S., Röder, B., & Heed, T. (2017). Task demands  
1158 affect spatial reference frame weighting during tactile localization in  
1159 sighted and congenitally blind adults. *PLOS ONE*, *12*(12), e0189067.  
1160 <https://doi.org/10.1371/journal.pone.0189067>
- 1161 Schütz, I., Henriques, D. Y. P., & Fiehler, K. (2013). Gaze-centered spatial  
1162 updating in delayed reaching even in the presence of landmarks.  
1163 *Vision Research*, *87*, 46–52.  
1164 <https://doi.org/10.1016/j.visres.2013.06.001>
- 1165 Shore, D. I., Gray, K., Spry, E., Spence, C., & others. (2005). Spatial  
1166 modulation of tactile temporal-order judgments. *Perception*, *34*(10),  
1167 1251–1262.
- 1168 Shore, D. I., Spry, E., & Spence, C. (2002). Confusing the mind by crossing  
1169 the hands. *Cognitive Brain Research*, *14*(1), 153–163.  
1170 [https://doi.org/10.1016/S0926-6410\(02\)00070-8](https://doi.org/10.1016/S0926-6410(02)00070-8)
- 1171 Simon, J. R., Hinrichs, J. V., & Craft, J. L. (1970). Auditory SR compatibility:  
1172 Reaction time as a function of ear-hand correspondence and ear-  
1173 response-location correspondence. *Journal of Experimental*  
1174 *Psychology*, *86*(1), 97–102.
- 1175 Singmann, H. (2015). *afex: Analysis of Factorial Experiments*. [http://R-](http://R-Forge.R-project.org/projects/afex/)  
1176 [Forge.R-project.org/projects/afex/](http://R-Forge.R-project.org/projects/afex/)
- 1177 Thompson, A. A., Byrne, P. A., & Henriques, D. Y. P. (2014). Visual Targets  
1178 Aren't Irreversibly Converted to Motor Coordinates: Eye-Centered  
1179 Updating of Visuospatial Memory in Online Reach Control. *PLoS ONE*,  
1180 *9*(3), e92455. <https://doi.org/10.1371/journal.pone.0092455>
- 1181 Tramper, J. J., & Medendorp, W. P. (2015). Parallel updating and weighting of  
1182 multiple spatial maps for visual stability during whole body motion.

- 1183 *Journal of Neurophysiology*, 114(6), 3211–3219.  
1184 <https://doi.org/10.1152/jn.00576.2015>
- 1185 van Beers, R. J., Wolpert, D. M., & Haggard, P. (2002). When Feeling Is More  
1186 Important Than Seeing in Sensorimotor Adaptation. *Current Biology*,  
1187 12(10), 834–837. [https://doi.org/10.1016/S0960-9822\(02\)00836-9](https://doi.org/10.1016/S0960-9822(02)00836-9)
- 1188 Vehtari, A., Gabry, J., Magnusson, M., Yao, Y., & Gelman, A. (2017). *loo*:  
1189 *Efficient Leave-One-Out Cross-Validation and WAIC for Bayesian*  
1190 *Models*. <https://mc-stan.org/loo/>
- 1191 Vehtari, A., Gelman, A., & Gabry, J. (2017). Practical Bayesian model  
1192 evaluation using leave-one-out cross-validation and WAIC. *Statistics*  
1193 *and Computing*, 27(5), 1413–1432. [https://doi.org/10.1007/s11222-](https://doi.org/10.1007/s11222-016-9696-4)  
1194 [016-9696-4](https://doi.org/10.1007/s11222-016-9696-4)
- 1195 Watanabe, J., Nakatani, M., Ando, H., & Tachi, S. (2009). Haptic localizations  
1196 for onset and offset of vibro-tactile stimuli are dissociated. *Experimental*  
1197 *Brain Research*, 193(3), 483–489. [https://doi.org/10.1007/s00221-009-](https://doi.org/10.1007/s00221-009-1711-y)  
1198 [1711-y](https://doi.org/10.1007/s00221-009-1711-y)
- 1199 Yamamoto, S., & Kitazawa, S. (2001). Reversal of subjective temporal order  
1200 due to arm crossing. *Nat. Neurosci.*, 4(7), 759–765.  
1201 <https://doi.org/10.1038/89559>
- 1202
